# Supplementary material for: Frequent Video Game Players Resist Perceptual Interference
Source: PLoS One. 2015 Mar 25;10(3):e0120011. doi: 10.1371/journal.pone.0120011 (PMC4373892; doi:10.1371/journal.pone.0120011)
Supplement: S1 Raw Data — File contains the relevant raw data used to calculate all present figures and statistical operations. (XLSX) [file pone.0120011.s001.xlsx]

## Sheet: Sheet1
75% Threshold SOA					% Improvement (day1 to day2)
	d1b1	d1b2	d2b1	d2b2		bg1	bg2
Gamers	110	130	90	95		18.1818	26.9231
	90	90	70	70		22.2222	22.2222
	90	70	70	70		22.2222	0		Berard
	60	60	60	60		0	0		Watanabe
	180	140	80	100		55.5556	28.5714		raw data
	60	120	60	80		0	33.3333		2015
	80	120	90	100		-12.5	16.6667
	100	140	80	130		20	7.14286
	100	130	110	110		-10	15.3846
75% Threshold SOA					% Improvement (day1 to day2)
	d1b1	d1b2	d2b1	d2b2		bg1	bg2
Non-Gamers	90	115	140	95		-55.5556	17.3913
	70	90	80	90		-14.2857	0
	130	150	100	90		23.0769	40
	80	90	80	60		0	33.3333
	80	170	140	90		-75	47.0588
	130	90	90	100		30.7692	-11.1111
	70	150	90	110		-28.5714	26.6667
	120	90	75	90		37.5	0
	160	160	120	160		25	0
Percent correct at each SOA					Standard Error for each percent correct at each SOA
Gamers					Non-Gamers
SOA	d1b1	d1b2	d2b1	d2b2	SOA	d1b1	d1b2	d2b1	d2b2
60	56.24	58.97	61.99	57.26	60	56.41	54.38	54.33	56.41
80	70.29	64.41	80.34	71.37	80	64.67	59.82	68.87	64.76
100	79.49	74.64	86.04	83.48	100	74.49	69.51	75.33	78.49
120	86.03	78.34	91.45	88.03	120	83.63	76.49	82.04	87.05
140	85.75	85.47	88.74	91.45	140	84.06	81.19	87.46	91.59
160	89.46	88.32	91.79	89.73	160	85.19	89.31	86.46	91.45
180	88.88	90.31	93.73	95.59	180	86.05	87.75	88.58	94.02
SOA	d1b1	d1b2	d2b1	d2b2	SOA	d1b1	d1b2	d2b1	d2b2
60	2.2	2.2	2.4	2.9	60	3.54	3.24	2.89	2.12
80	3.45	2.3	3.2	3.89	80	2.68	3.94	4.39	4.25
100	5.48	4.01	3.01	5.4	100	5.94	5.22	6.32	6.49
120	4.51	4.45	4.83	4.97	120	5.12	5.19	5.86	5.95
140	3.4	2.3	3.73	4.52	140	4.73	5.51	3.82	5.02
160	3.65	3.01	1.99	3.87	160	4.54	3.87	2.98	3.49
180	2.14	3.54	2.89	3.28	180	3.46	2.21	4.39	3.1
